# Supplementary material
Source: MDPI journal article supplement (https://www.mdpi.com/2073-445X/13/2/180)
Supplement: s1 [file s1]

## Supplementary Materials

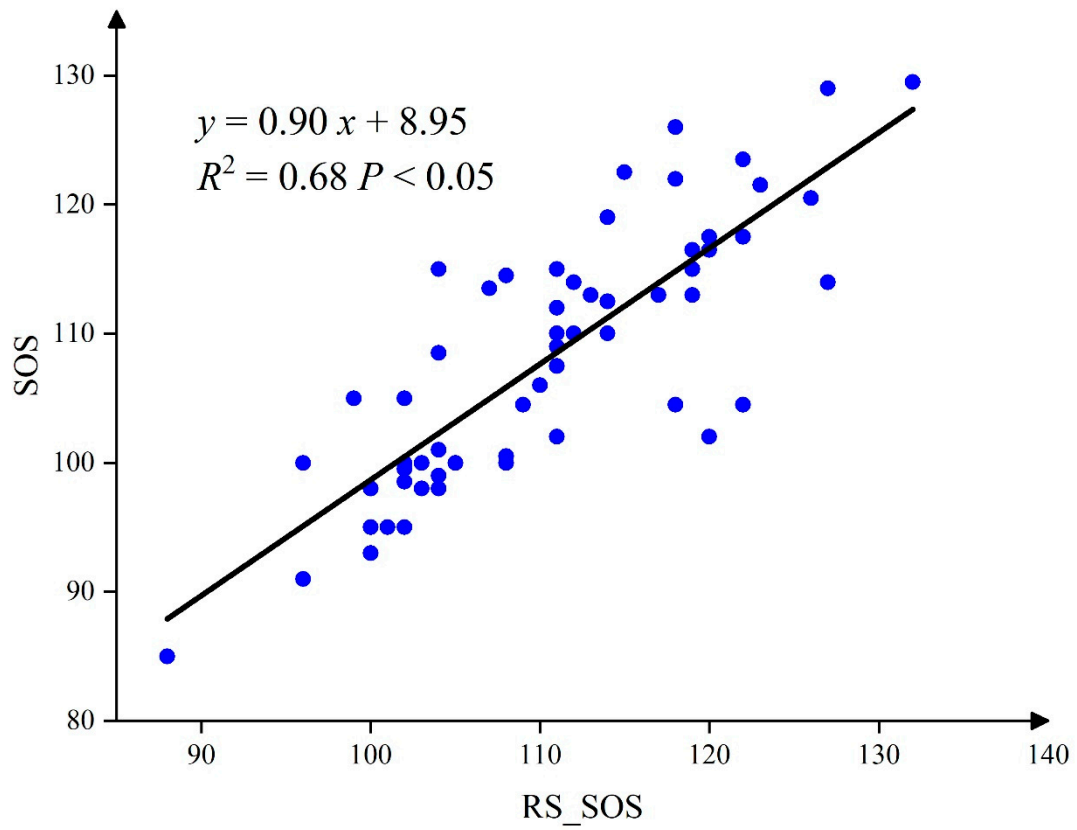

**Fig. S1. The correlation coefficient between the mean SOS values retrieved using three different inversion methods and the SOS observed at the ground level.**
